# Supplementary material
Source: PubMed Central journal article supplement (PMC7373197)

**A**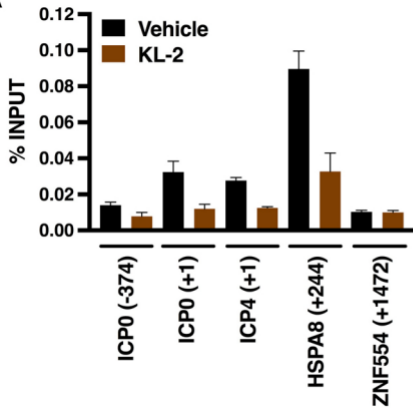**B**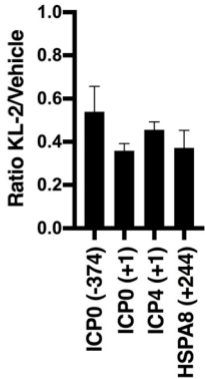

Supplement: mBio.01216-20-sf002.pdf [file mBio.01216-20-sf002.pdf]

**A**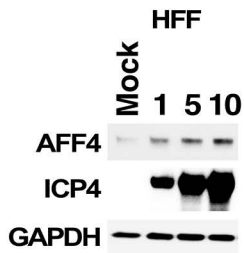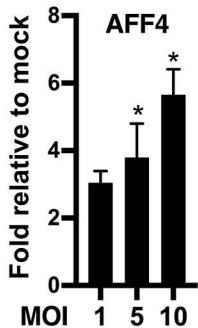**B**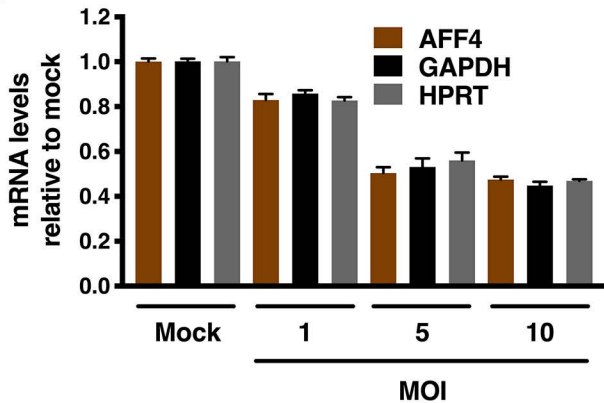**C**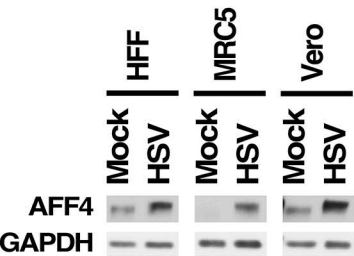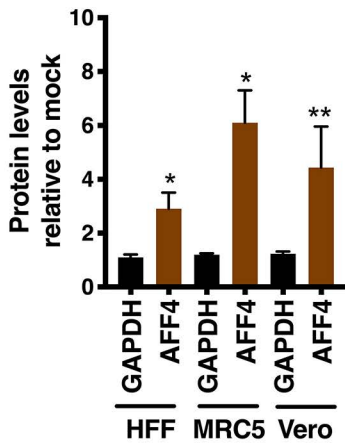

Supplement: mBio.01216-20-sf003.pdf [file mBio.01216-20-sf003.pdf]

**A**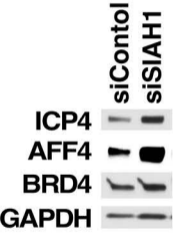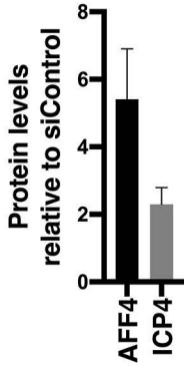**B**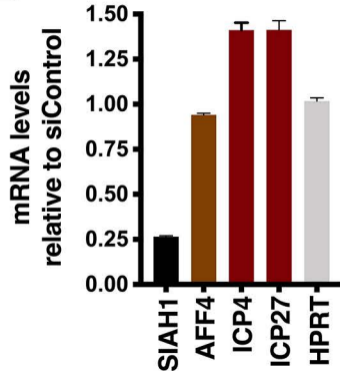**C**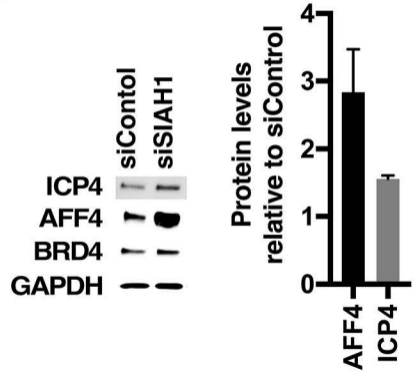

Supplement: mBio.01216-20-sf004.pdf [file mBio.01216-20-sf004.pdf]
